1 **Sex-specific speed-accuracy tradeoffs shape neural processing of acoustic signals in a**  
2 **grasshopper**

3 Jan Clemens<sup>1</sup>, Bernhard Ronacher<sup>2</sup>, Michael S. Reichert<sup>3</sup>

4

5 Affiliations:

6 1 European Neuroscience Institute Göttingen – A Joint Initiative of the University Medical Center  
7 Göttingen and the Max-Planck Society, Grisebachstrasse 5, Göttingen, 37077, Germany

8 2 Behavioral Physiology Group, Department of Biology, Humboldt-Universität zu Berlin,  
9 Germany

10 3 Department of Integrative Biology, Oklahoma State University, Stillwater OK USA

11 Correspondence: [clemensjan@gmail.com](mailto:clemensjan@gmail.com)

12

13 Funding:

14 JC: DFG CL 596/1-1 (32951824), SPP 2205 (430158535)

15 BR: DFG Ro 547/12-1

16 MR: US National Science Foundation International Research Fellowship Program (IRFP  
17 1158968)

18

19 Acknowledgments:

20 Michael Rumpold assisted with the experiments, and members of the Behavioral Physiology  
21 Group helped with field collection and husbandry.

22

23 Contributions:

24 Designed experiments and collected the behavioral data – BR, MR

25 Fitted and analyzed the model – JC

26 Wrote the manuscript – JC, BR, MR

27

28

29

30 **Abstract**

31 Speed-accuracy tradeoffs – being fast at the risk of being wrong – are fundamental to many  
32 decisions and natural selection is expected to resolve these tradeoffs according to the costs and  
33 benefits of behavior. We here test the prediction that females and males should integrate  
34 information from courtship signals differently because they experience different payoffs along  
35 the speed-accuracy continuum. We fitted a neural model of decision making (a drift-diffusion  
36 model of integration to threshold) to behavioral data from the grasshopper *Chorthippus*  
37 *biguttulus* to determine the parameters of temporal integration of acoustic directional information  
38 used by male grasshoppers to locate receptive females. The model revealed that males had a  
39 low threshold for initiating a turning response, yet a large integration time constant enabled  
40 them to continue to gather information when cues were weak. This contrasts with parameters  
41 estimated for females of the same species when evaluating potential mates, in which response  
42 thresholds were much higher and behavior was strongly influenced by unattractive stimuli. Our  
43 results reveal differences in neural integration consistent with the sex-specific costs of mate  
44 search: Males often face competition and need to be fast, while females often pay high error  
45 costs and need to be deliberate.

46 **Introduction**

47 Sensory information is inherently noisy. Repeated sampling and integration of information over  
48 time reduces noise, and is a ubiquitous strategy in information processing and decision making  
49 [1-3]. The neural algorithm by which ecologically-relevant sensory information is integrated is  
50 expected to be shaped by a fundamental tradeoff between the speed of decision making and  
51 the accuracy of the inferred sensory input [1,4,5]. Studies of animals trained in artificial decision-  
52 making tasks show that the resolution of the speed-accuracy tradeoff depends on the relative  
53 costs of delaying the decision to accumulate more information compared to the costs of making  
54 an error based on insufficient information, the signal-to-noise ratio, and the stability of the  
55 sensory information over time [6-12]. However, all of these factors vary in natural environments,  
56 and among individuals, sexes and species [3,13,14]. While variation in speed-accuracy  
57 tradeoffs with condition or experience has been reported for naturalistic tasks [15-19], there  
58 exists little direct evidence that natural integration processes are shaped by selection, for  
59 instance from comparisons across groups expected to face different costs [3,20].

60  
61 The processing of signals related to mate choice presents a clear instance in which selection  
62 likely favors different resolutions of the speed-accuracy tradeoff in the two sexes, which in turn  
63 are expected to result in sex differences in temporal integration: Integration processes in males  
64 should facilitate the fast decisions required for successful competition, while integration in  
65 females should be slower, but enable more accurate decisions about male quality. The  
66 existence of sex-specific circuits in the nervous system suggests that temporal integration could  
67 indeed be implemented in a sex-specific manner [21,22], but whether the characteristics of  
68 temporal integration differ between males and females in a natural task is unclear. Here we  
69 combine an existing behavioral data set [23] with new data and fit a drift-diffusion model [5] to  
70 characterize how the nervous system accumulates sensory cues and triggers decisions in mate  
71 searching. Based on the expected costs and benefits of different integration strategies under  
72 sexual selection theory, we test predictions for how integration may differ between males and  
73 females evaluating acoustic signals of the opposite sex.

74  
75 The grasshopper *Chorthippus biguttulus* provides an excellent model for studies of temporal  
76 integration because both males and females produce and respond to acoustic signals during  
77 mate searching (Fig. 1A) [24], but integration and decision making strategies are expected to  
78 differ between the sexes because they are subject to different selection pressures [25]. Males  
79 produce calling songs to find females; receptive females are stationary but respond with songs  
80 that facilitate mate localization by the male [26]. In *C. biguttulus*, females pay high costs from  
81 making errors [25,27,28], because they are egg-limited and mating with a male of another  
82 species or of low genetic quality produces no or low-quality offspring. In addition, singing  
83 exposes females to predators and parasitoids. Females should therefore avoid responding to  
84 the song from males of another species or of low genetic quality. By contrast, females do not  
85 face competition from other females and therefore are not under pressure to be fast. Females  
86 are therefore expected to favor accuracy over speed when evaluating the male song pattern.  
87 This was confirmed by a drift-diffusion model for temporal integration based on female response  
88 behavior [29,30]. The model parameters indicated that females integrate information across the  
89 entire calling song of a male with a high threshold for response and very high negative

90 weighting of unattractive song components (i.e., those of heterospecific or malformed males).  
91 These integration parameters ensure the accurate detection of unsuitable males combined with  
92 slow behavioral responses to attractive males.

93  
94 Here, we extend the modelling approach to male mate localization, which is predicted to have  
95 very different integration characteristics. Female density is low in the visually cluttered  
96 environment and females lack conspicuous visual characteristics or long-range chemical cues  
97 that would allow males to find them. Chance encounters are therefore rare and the female  
98 response song is often the only possibility for localizing receptive females [28,31]. Furthermore,  
99 the speed of approach is critical because females already engaged in close-range courtship  
100 with faster arriving males will not continue to advertise their position, preventing slower males  
101 from localizing those females. Thus, although males rarely directly interact with one another in  
102 physical competitions, they nevertheless face high levels of competition to rapidly localize  
103 responsive females in a crowded and noisy environment [32]. Males should therefore favor  
104 speed over accuracy to a greater degree than females, although we do not expect males to  
105 completely disfavor accuracy when integrating directional cues from the female song, since  
106 localization errors increase the time exposed to predators and parasitoids, and will prevent them  
107 from finding the female. We predict therefore that males will have higher sensory weightings (or  
108 equivalently, a lower response threshold) than females, reflecting their speedier response. This  
109 puts them at risk of making errors if early sensory information is wrong. Furthermore, to  
110 maintain accuracy when directional cues are equivocal, we predict that integration times will be  
111 at least as long as typical female songs so that males can maximize the chances of integrating  
112 sufficient directional information from female signals.

113  
114 To test these predictions, we used new and previously published behavioral data from a two-  
115 speaker playback design that measured male localization of artificial female songs with  
116 conflicting directional cues [23]. We applied a drift-diffusion model to the behavioral data to  
117 determine the parameters of temporal integration in males. The drift-diffusion model  
118 corresponded very well with males' decisions, and the model's parameters matched our  
119 predictions of long temporal integration times and a low threshold for response, which contrasts  
120 with the parameters determined for female behavior using the same model. This reveals sex-  
121 specific differences in the neural processing of sexual signals consistent with predictions from  
122 sexual selection theory.

123  
124

## 125 **Methods**

### 126 **Animals**

127 Behavioral data were collected as described in [23]. We used lab-reared and wild-caught males  
128 of the species *C. biguttulus*. Lab-reared males were the F1 offspring from wild-caught  
129 individuals and were isolated by sex at the last instar nymph stage and reared in cages  
130 separated by sex. Wild-caught males could have mated previously but were kept separate from  
131 females for at least three days before the experiments, which is sufficient for them to regain  
132 motivation to respond to female signals [33,34]. To further minimize variation in male motivation  
133 to respond, we only tested males that responded to a test signal from an attractive female,  
134 indicating high motivation to engage in courtship behavior. We did not systematically track male  
135 age or exclude males based on their age. Both lab-reared and wild-caught males were group-  
136 housed in male-only cages in similar conditions. In group housing, all males would have been  
137 exposed to the song of other males, as well as the songs of female playbacks used to assess  
138 male motivation and identify test subjects. We, as well as previous studies [35], did not observe  
139 any systematic differences in the selectivity of lab-reared or wild-caught males, nor any effect of  
140 previous experience on the integration of acoustic cues from females. There is also no evidence  
141 for learning in this communication system.

142

### 143 **Behavioral experiments**

144 Motivated adult were placed between two speakers that broadcast an artificial female song  
145 stimulus (Fig. 1B). A female song consists of subunits (“syllables”) that are separated by  
146 pauses. The syllables in our female model song were separated by a 17.5 ms pause; each  
147 syllable consisted of 6 sound pulses (average pulse duration 10.7 ms). This stimulus pattern  
148 was highly attractive and reliably elicited turning responses in males, allowing us to assess how  
149 directional cues from the stimulus were integrated by the males. Syllables that lack a pause or  
150 do not consist of distinct sound pulses are not attractive to males and fail to elicit male turning  
151 responses [36-38]. Individual syllables were manipulated to have timing or level differences  
152 between the speakers (see below). Stimuli were broadcast at 60 dB SPL at the position of the  
153 male. Males were presented with ten repetitions of each stimulus. We tested a total of 204  
154 males and most males were tested with more than one stimulus. The median number of  
155 different stimuli tested per male (with 10 repetitions per stimulus) was 8 (inter-quartile range 5-  
156 10). Stimuli were repeated at a variable rate because each time the male moved, we had to re-  
157 position the speakers to center the male once he was again stationary. 44 stimuli contained 12  
158 syllables to mimic a typical female song, but we also tested shortened stimuli with 8 (3 stimuli),  
159 5 (33 stimuli) or 3 (1 stimulus) syllables to better characterize the dynamics of integration. We  
160 include data for male responses from a total of 81 stimuli (Fig. S1). Data for 38/81 stimuli were  
161 previously published in [23].

162 Male lateralization behavior was quantified as follows. First, the response for each male was  
163 quantified as the proportion of turns directed towards the stimulus channel designated as the  
164 reference out of the total number of turns towards either stimulus (“0” if the male turned away  
165 from the reference speaker, “1” when the male turned towards the reference speaker). For  
166 some stimuli, males responded to the stimulus but turned forward instead of towards one of the  
167 speakers and we scored these responses as “0.5”, equivalent to a decision probability of 0.5  
168 towards (score 1.0) and 0.5 away (score 0.0) from the reference speaker. We then averaged the

169 responses across all males tested with that stimulus ( $N=15-23$  males tested per stimulus,  
170 median 20 males). The experimental setup did not allow us to score turning latencies and those  
171 data were therefore not available for model fitting. However, our stimulus design, with conflicting  
172 cues placed in different positions within the song, allows us to reliably infer the dynamics of cue  
173 integration from the response scores (see below).

## 174 **Stimulus design**

175 The dynamics of sensory integration in males were inferred using artificial female songs that  
176 varied in duration and in the sequence of directional cues (see Fig. S1 for all stimulus patterns).  
177 Each syllable provided one of three types of directional cue: 1) Level cues: we generated stimuli  
178 with level differences by silencing some syllables on one speaker channel. This effectively  
179 results in an 8 dB interaural level difference [39,40], 2) Timing cues, in which the syllable from  
180 one speaker led the other by 4 ms, or 3) no directional cues (“neutral”), in which syllables were  
181 presented simultaneously at equal amplitude from both channels. Both timing and level cues  
182 elicit orientation responses in male grasshoppers, but are expected to provide directional cues  
183 of different strength depending on the magnitude of each cue. We did not attempt to equalize  
184 the strength of the timing and level cues used for our stimuli, and instead estimated these  
185 parameters from the models. We systematically varied the number and location within the song  
186 of these directional cues to generate stimuli with different amounts of directional information,  
187 and in some cases with conflicting directional information. This stimulus design with serially  
188 conflicting directional cues was critical for calibrating the model parameters [41]. For instance,  
189 responses to songs in which syllables at the beginning of the song indicated a female in the  
190 direction of one speaker and those at the end of the song indicated a female in the opposite  
191 direction reveal over how many syllables males integrate and when decisions are fixed.  
192 Combining this stimulus design with a neural model of decision making (see below) allowed us  
193 to infer the sensory weights and thresholds, and estimate decision times, even in the absence of  
194 reaction time data. A control stimulus with neutral directional cues elicited turning responses  
195 with random directions (score 0.53, random turning would produce 0.5). Another control  
196 stimulus that was broadcast from only one speaker, reliably elicited turns in males (90% of  
197 trials) and all of those turns were correctly directed towards the broadcasting speaker. See Fig.  
198 S1 for a list of all stimulus patterns used in this study.

## 199 **Comparison of correlations between the stimulus and the behavior**

200 We assessed the strength of the relationship (squared Pearson’s  $r$ ) between the males’ turning  
201 responses and different parts of the 12 syllable stimuli, by dividing each stimulus in thirds  
202 (syllables 1-4, 5-8, 9-12), calculating the average directional cue for each third, and correlating  
203 that average with the males’ turning responses (Fig. S2B). To account for stimulus-intrinsic  
204 correlations, arising from regularity in the stimulus sequences (Fig. S1), we also correlated the  
205 average cue for each third with the average cue over the full song (Fig. S2A). This revealed that  
206 the middle of the song was most strongly correlated with the cues from the full song, which is a  
207 result of our stimulus design because the cue direction often changed halfway through the song  
208 (Fig. S1). The difference of the correlation obtained from the behavior and from the full stimulus  
209 indicates stimulus thirds that are more or less influential on the behavior than expected from the  
210 stimulus statistics (Fig. S2C, 1C).

## 211 **Modelling**

212 The stimulus is defined as a sequence  $s(t)$  with  $t=[1, \dots, T]$ ,  $T$  being the number of syllables in  
213 the stimulus, and a sign indicating the side of the cue relative to the reference speaker (“-1”  
214 away from the reference, “+1” towards the reference, “0” neutral).

### 215 *Averaging model*

216 As a baseline, the averaging model simply averages the directional information over the full  
217 song and the predicted response  $\rho$  is then a function of that average:  $\rho=f(x(T+1))$ , with  $x(t+1) =$   
218  $x(t) + Z(s(t))$ ,  $x(0)=0$ . The sign function  $Z(s(t))$  returns -1 if  $s(t)<0$  and +1 otherwise. To account  
219 for saturation effects, we set  $f$  to be a sigmoidal, which was fitted to minimize the mean squared  
220 error over all stimuli between the prediction  $\rho$  of the averaging model and the males’ turning  
221 response  $r$ . However, this only marginally increased the performance of the simple averaging  
222 models ( $r^2$  linear: 0.72,  $r^2$  sigmoidal: 0.75).

### 223 *Drift-diffusion model*

224 In a drift-diffusion model, the cues from each syllable are weighted and assigned a sign based  
225 on the direction they indicate. The weighted cues are then integrated with an integration  
226 timescale  $\tau$ , which determines the “leakiness” of integration, with a value of infinity  
227 corresponding to perfect integration with no forgotten information, and smaller values  
228 corresponding to forgetting of information that came before that time interval. Noise  $\sigma$  is added  
229 to the integrated sensory information from each syllable, and the decision is fixed when a  
230 decision threshold of either  $+\theta$  or  $-\theta$  is crossed, indicating the decision to turn towards or away  
231 from the reference speaker, respectively. If the threshold is not crossed before the end of the  
232 song, the decision is made based on the sign of the integrated information at the end of the  
233 song. An urgency gain parameter was included to account for the possibility that sensory  
234 weights increase or decrease over time [6,42]; increased urgency may be expected for males  
235 that need to localize receptive females quickly upon receipt of evidence that one is present.  
236 More precisely, the integrated information  $x$  after syllable  $t$  is given by

$$237 \quad x(t+1) = \begin{cases} -\theta, & \text{if } x(t) < -\theta \\ \theta, & \text{if } x(t) > \theta \\ x(t)/\tau + w(t)s(t) + \eta(t)\sigma, & \text{otherwise} \end{cases}$$

238 with  $x(0)=0$ , an integration time constant  $\tau$ , and a decision threshold  $\theta$ . Noise  $\eta(t)$  was drawn at  
239 each time step from a normal distribution with zero mean and unit variance. For timing cues,  $w$   
240 was fixed to 1.0 for all models. For level cues,  $w$  was fixed to 1.0 for models that did not  
241 differentially weight timing and level cues (“single cue” in Table S1) and optimized during fitting  
242 for models that did (“two cues”). For models with urgency gain, the sensory weight changed  
243 over time and was defined as  $w(t)=w^*(1+(t-1)\gamma)$ , with  $\gamma$  being the urgency gain [42]. Experiments  
244 with alternative implementations in which the urgency gain reduced the threshold over time [6]  
245 yielded similar results of negligible gain. The decision threshold  $\theta$  was sticky – once it was  
246 crossed, integration ceased and  $x(t)$  was fixed to  $\pm\theta$ . The predicted response,  $\rho$ , was  
247 determined by the sign of the integrated information after the last syllable,  $Z(x(T+1))$  averaged  
248 over 1000 different instantiations of the noise  $\eta$ . The simple averaging model can be considered  
249 a special case of a drift-diffusion model with  $w=1$  for level and timing cues,  $\sigma=0$ ,  $\tau=\infty$ , and  $\theta=\infty$ .

250 *Model fitting and evaluation*

251 The parameters of the drift-diffusion models were optimized by minimizing the mean-squared  
252 error between the predicted and the males' responses using a Genetic Algorithm ([43], see [44]  
253 for details). To speed up convergence, upper and lower bounds were defined for all parameters:  
254  $0 < w_L < 10$ ,  $1 < \tau < 40$ ,  $0 < \sigma < 5$ ,  $0 < \theta < 10$ ,  $0 < \gamma < 10$ . We ensured that these bounds did not affect the  
255 final parameter estimates. Fits were evaluated using leave-one-out cross-validation. That is, the  
256 model parameters were fitted on all but one stimulus (and its mirror version) and a prediction  
257 was then generated for the left-out stimuli. Doing this for all stimuli resulted in 81 parameter  
258 estimates and 157 predictions. The squared Pearson's coefficient of correlation,  $r^2$ , between the  
259 predictions and the males' responses was used to quantify model performance. Different  
260 models were compared using Akaike's Information Criterion (AIC), which penalizes models with  
261 many parameters. The AIC score is given by  $AIC = 2k + n \ln(e)$ , where  $k$  is the number of  
262 parameters of the model,  $n$  is the number of samples used for fitting the model, and  $e$  is the sum  
263 of squared residuals between the predicted and the male's responses:  $e = \sum (r - \rho)^2$ . Smaller AIC  
264 scores are better.

265



266 **Results**

267 **Noisy integration to threshold explains turning behavior.**

268 Based on the correlation of the cues in different parts of the song with behavior, we find that the  
 269 beginning of the song influences behavior more than expected (Fig. 1C, S2). This suggests an  
 270 integration process in males that does not always consider information from the full female song  
 271 but instead fixes decisions rapidly and dynamically with the available sensory evidence [23]. To  
 272 account for this finding, we fitted different models of cue integration and decision making. Model  
 273 comparison (Akaike Information Criterion) revealed that the simplest model that explained our  
 274 data is a drift-diffusion model with an infinite integration time in which timing and level cues had  
 275 different weights, but their weights did not change over time (i.e., an urgency gain of zero)  
 276 (Table S1, Fig. 2A-C, Fig. S3). We consider this as the best fit model in discussions below. A  
 277 threshold-less model that simply averaged directional cues with identical weights for both cue  
 278 types across the entire song performed worse (Fig. 2C) as did a drift-diffusion model variant  
 279 with identical weights for both cue types (Table S1). These simpler models performed well on  
 280 average (Table S1) because for many stimuli in our dataset, the average cue still predicted the  
 281 behavior well. However, the performance gap between these models and our best fit model was  
 282 much higher for stimuli with conflicting or mixed cues, for which correct weighting and stopping  
 283 of integration after threshold-crossing were crucial model parameters for predicting males'  
 284 behavior (Fig. 2C). Adding even more complexity to the model with the addition of leaky  
 285 integration or an urgency parameter did not improve performance (Table S1). Model parameters  
 286 were similar for all of the fitted variants of the drift-diffusion model, indicating that our results are  
 287 robust to changes in model complexity.

288  
289

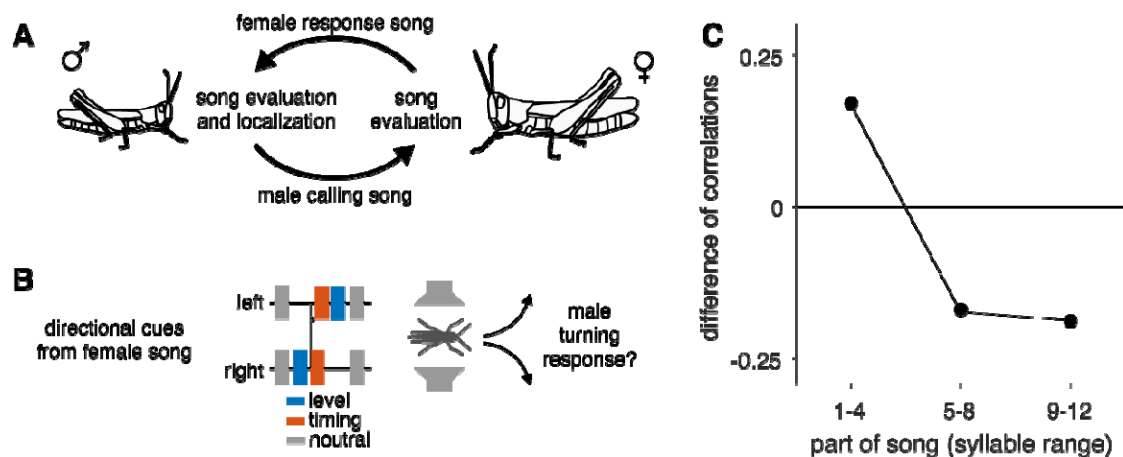

290  
291  
292  
293  
294  
295  
296  
297  
298  
299

**Figure 1 – Performance of a simple averaging model compared to male behavior**

**A** Bidirectional acoustic communication during mate search in the grasshopper *C. biguttulus*.

**B** Schematic of the paradigm – two speakers were placed on either side of the male, artificial female song is played, and the direction of the male turning response is scored. Directional cues are provided by each syllable and arise from level differences (sound on one speaker only, blue) or timing differences (sound on one speaker delayed by 4ms, red). Both cue types are known to elicit turning responses in males.

**C** Difference in the correlation of different thirds of the 12 syllable songs observed in behavior and estimated from the stimulus statistics. The beginning tends to be more, the middle and end less influential on behavior than expected from the stimulus statistics. See Fig. S2 for details and number of stimuli.

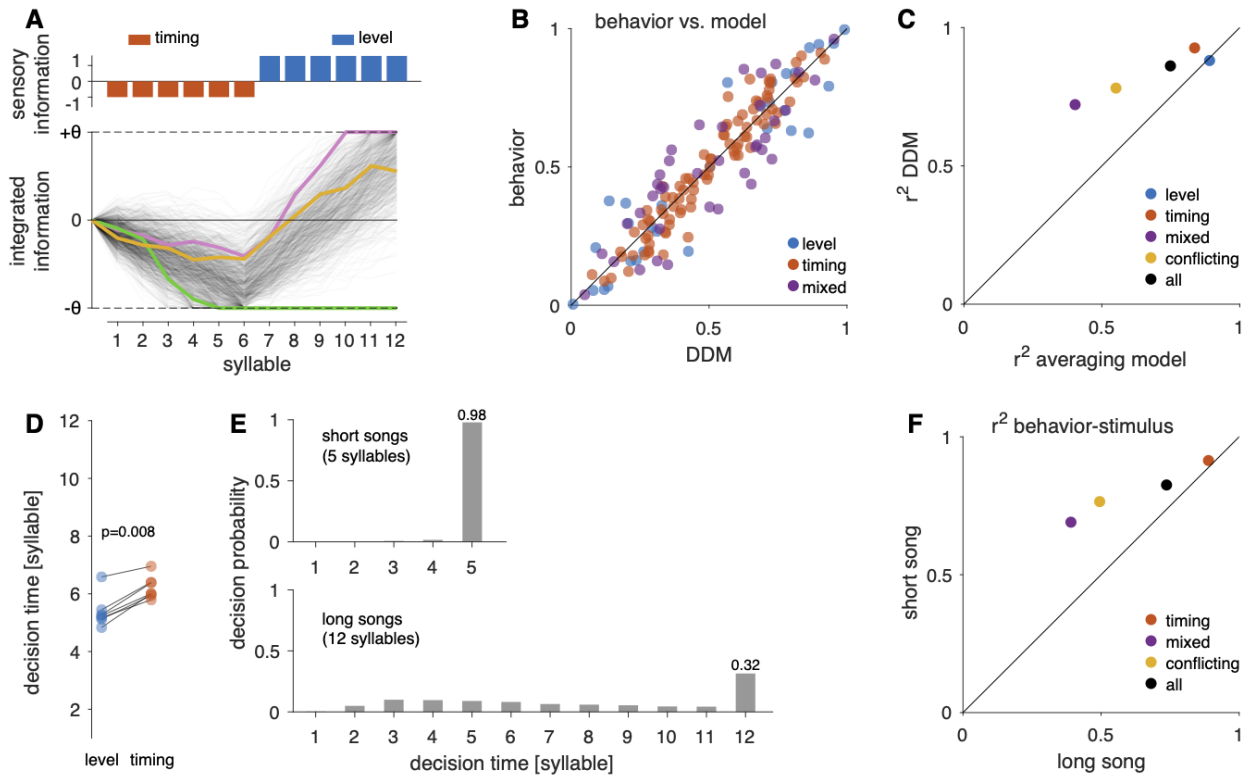

300

301 **Figure 2 – A drift-diffusion model (DDM) reproduces the behavior well and reveals dynamics of temporal**  
 302 **integration.**

303 **A** DDM responses for a 12-syllable stimulus (top) with the first 6 syllables containing timing cues (red) away from the  
 304 reference speaker (-), and 6 syllables with level cues (blue) towards the reference speaker (+). Each cue type is  
 305 assigned a weight (height of bars, top). Stimulus information is integrated noisily and a decision towards the  
 306 reference (+) or opposite (-) speaker is fixed when the decision threshold  $\theta$  is crossed. Thin black lines indicate 1000  
 307 runs with independent noise realizations. Colored lines highlight example runs that cross the negative threshold  
 308 (green), the positive threshold (purple), or no threshold (orange), in which case the decision is determined by the sign  
 309 of the evidence at song end (+).

310 **B** Proportion of turns towards the reference speaker in model and behavior. Color indicates cue composition of the  
 311 songs. Diagonal line corresponds to perfect match between model and behavior. All points are close to that line  
 312 ( $r^2=0.86$ ).

313 **C**  $R^2$  between model predictions and behavioral data for the best fitting model (DDM) compared to that of a simple  
 314 averaging model for different data subsets (see legend). The best fitting model outperforms the simple averaging  
 315 model in particular for stimuli with mixed (purple, stimuli containing timing and level cues) and conflicting cues  
 316 (yellow, stimuli with cues from both sides).

317 **D** Mean decision time (syllable at which threshold is crossed) for seven stimuli with matching patterns (lines) but level  
 318 (blue) or timing (red) cues. Consistent with their higher weight in the model, level cues drive decisions by about 1  
 319 syllable earlier ( $p=0.008$ , left-sided sign test). See Fig. S4 for the decision time distributions for each of the stimuli  
 320 depicted here.

321 **E** Decision times for short songs with 5 syllables (top,  $N=66$  stimuli) and long songs with 12 syllables (bottom,  $N=83$   
 322 stimuli). For most long songs, integration reaches threshold before song end. For nearly all short songs, integration  
 323 fails to cross threshold. Short song mostly contained timing cues (Fig. S1). Numbers in the last bar indicate the  
 324 probability of not reaching the threshold for the two stimulus sets.

325 **F** Correlation of behavior with the average directional cue over the full song for short and long songs. The failure of  
 326 threshold crossing before song end for short songs (E, top) leads to integration over the full song and a higher  
 327 correlation with the average directional cue. There is no “level” stimulus set for this analysis since our data set did not  
 328 contain such stimuli for short songs (cf. C, Fig. S1).

329

330

331 **Males integrate directional cues with long memory, cue-specific weights, low thresholds,**  
 332 **and high noise**

333 The best fit model indicated that males can integrate directional cues over the whole song, and  
334 even in models with a leaky integration, the time constant was estimated at 24 syllables (Table  
335 S1), which is twice as long as both the longest song in our dataset (12 syllables; 1.19 s) and a  
336 typical female song (12-15 syllables, mean $\pm$ SD = 1.18 $\pm$ 0.23 s; [45]). Thus, sensory information  
337 from the whole song has the potential to influence the localization response. The decision  
338 threshold  $\theta$  of the best fit model had a value of 7.14. Level and timing cues were weighted  
339 differently, with the level cue outweighing the timing cue by a factor of 1.65. The minimum  
340 number of syllables required to cross the threshold ( $\theta/w$ ) was therefore 8 for timing and 5 for  
341 level cues, meaning that the stronger level cues drove faster decisions (Figs. 2D, S4). The low  
342 threshold resulted in decisions usually being fixed before the end of long 12-syllable songs (Fig.  
343 2E), consistent with our finding that the beginning of the song is more and the end of the song is  
344 less influential than expected for observed male turning responses (Figs. 1C, S2). This means  
345 that males trade accuracy in favor of speed, since responding before the end of song can result  
346 in localization errors if sensory information early in the song is unreliable. For the short songs,  
347 which largely consisted of the weaker timing cues, sensory information was insufficient to drive  
348 decisions by crossing the threshold in our model, and the turning direction was determined by  
349 the value of the integrated information at the song end (Fig. 2E). This is consistent with the  
350 observation that the average directional cue over the full song is more predictive of behavior for  
351 the short songs, than for the long songs (Fig. 2F). The noise level  $\sigma$  of the best fit model was  
352 2.25; thus, the signal-to-noise ratios ( $w/\sigma$ ) were 0.44 for timing cues and 0.73 for level cues.  
353 Localization cues provided by single syllables are therefore relatively noisy, and integration is  
354 indeed necessary to infer sound direction reliably.

355

356

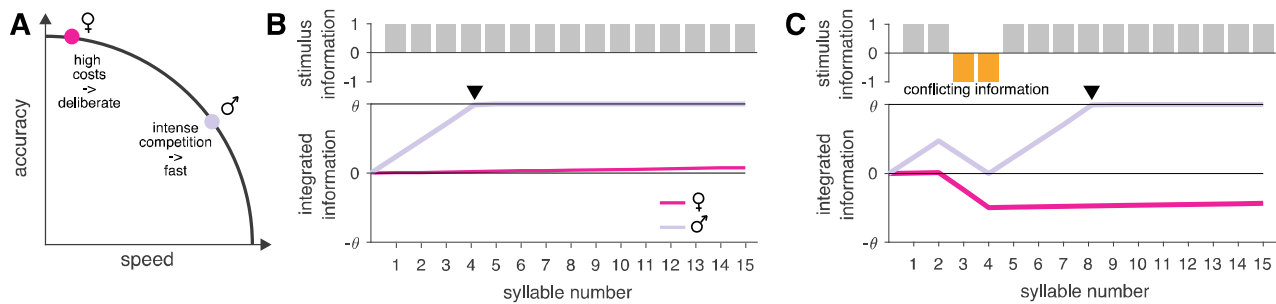

357

358

**Figure 3 – Sex-specific speed-accuracy trade-offs arise from differential integration dynamics.**

359

360

**A** Males and females differentially resolve speed-accuracy trade-offs when responding to acoustic communication signals. Females (magenta) pay high costs from errors and therefore maximize their accuracy by deliberation at the cost of speed. Males (gray) face intense competition with other males and trade accuracy in favor of speed.

362

363

**B, C** Integration dynamics tune decision making to the sex-specific speed-accuracy trade-offs. Shown is the integrated information (bottom) for females (magenta) and males (gray) for stimuli (top) with unequivocal (B) and conflicting (C) information. Integrated information is scaled relative to the decision thresholds  $\theta$  to facilitate the comparison between sexes. For females, individual stimulus elements correspond to species-typical (gray) and untypical (orange) patterns. Species-typical cues have low weight and are not sufficient to fix decisions before song end (B). Conflicting (negative) cues have a strong weight and practically veto positive responses (C). For males, the stimuli correspond to directional cues. Individual cues have high weight, which accelerates decisions (black arrowhead) for unequivocal information (B). Long integration times improve accuracy when cues are conflicting (C). See also Table S2. Female data from [29].

367

368

369

370

371

372

373

374

**Discussion**

375

376

377

378

379

380

381

382

383

384

385

Our drift-diffusion model of temporal integration applied to male behavior demonstrates that sexual selection has shaped the neural processing of acoustic stimuli to favor speedy decisions in males, in contrast to the slower, but more accurate decisions in females (Fig. 3A). The model accurately reproduced the males' localization behavior (Fig. 2B, C) and the model parameters describe an integration process that is consistent with the pressures facing males to rapidly localize a stationary, singing female in a noisy environment (Fig. 2D-F, Table S1). The same modeling technique was previously used on females of the same species evaluating songs of potential mates [29], and the differences in model parameters correspond with expectations of sexual selection theory that females should have a higher threshold for response and strongly avoid unattractive signal characteristics (Table S2). This is a rare demonstration of variation in temporal integration strategies associated with ecologically relevant and natural behaviors.

386

**Decisions in males are fast for strong cues and accurate for weak cues**

387

388

389

390

391

392

393

394

We found that males had a low threshold for response: the average time to decision inferred from the model was much less than the duration of the standard female song stimulus used in this study (Fig. 2D, E). Thus, when the evidence is strong, males can decide quickly. This corresponds with the behavior of males in localization experiments, in which they frequently turn towards a song before it ends [40]. The best fit model had higher weights for level cues than for timing cues (Table S2, Fig. S3B), and decisions were therefore faster with level cues than with timing cues (Fig. 2D). This does not imply that level cues always predominate over timing cues; instead the difference likely arose because of the specific values chosen for each cue: the

395 unilateral level cues (resulting in an approximately 8 dB ILD) were expected to provide stronger  
396 directional information than the bilateral timing cues (4 ms ITD) [40]. Importantly, this finding  
397 implies that cues are weighted by their strength, such that decision making is accelerated when  
398 evidence is strong.

399

400 Although we expected males' decisions to be biased towards speed, accuracy is also important  
401 because mistakes in localization could cause males to move out of hearing range of the female  
402 and prevent them from finding one another [35,46]. The signal-to-noise ratio for a single syllable  
403 was low (0.44 and 0.73, respectively), and males therefore did integrate over multiple syllables,  
404 although they usually reached threshold and made a decision before they heard all of the  
405 syllables in the full song (Fig. 2D, E). This also means that males would be less accurate in  
406 case directional cues early in the song indicate the wrong direction. Nevertheless, the model  
407 indicated that males had the capacity to integrate over a much longer time period if directional  
408 cues were weak and the threshold was not reached (Table S1). Thus, when directional cues  
409 were too weak for a speedy decision, males could integrate additional sensory information,  
410 which should improve signal-to-noise ratios and ultimately lateralization accuracy [32]. This  
411 explains the high accuracy of male directional responses in the presence of noise [35]. Long  
412 integration times are maladaptive when the information being integrated changes more rapidly  
413 than the integration time constant, leading to erroneous decisions [10,47]. However, in this  
414 system long integration may have few costs because the information evaluated by males in the  
415 female song, her position, is constant prior to the turning decision because females remain  
416 stationary while singing. The integration dynamics in males therefore resolve the speed-  
417 accuracy tradeoff by allowing for flexibility in decision making: Sensory information is able to  
418 drive fast responses when it is strong, but long integration times allow accurate localization of  
419 the female in case of weak cues.

420

421 While our experiments were designed to assess the decision-making strategies of males on a  
422 population level, some variation in decision-making strategies could depend on male state or  
423 consistent differences between individuals. In other species, competitively inferior males use so-  
424 called satellite or sneaker strategies to avoid direct competition with dominant males [48].  
425 However, in *C. biguttulus* direct agonistic interactions between males are rare and the primary  
426 means of competition is the ability to rapidly localize females. Slow decision making, similar to  
427 females', is therefore unlikely to be an advantageous alternative strategy for males in this  
428 species. Given that our model explains the behavior measured from different sets of males so  
429 well ( $r^2=0.86$ , Fig. 2 B, C), variation among individuals is likely low, and our main conclusion –  
430 that males trade accuracy in favor of speed – is likely to be robust to these factors.

431

### 432 **Integration of courtship signals is tuned to sex-specific costs**

433 Our finding that male *C. biguttulus* have a low threshold for response contrasts with the results  
434 from previous studies using a similar behavioral and modeling paradigm to characterize  
435 temporal integration in females of the same species [29,30]. Females were tested with songs  
436 consisting of a mixture of attractive and unattractive syllables. There was a large difference  
437 between males and females in how they weighted sensory information. In females, positive  
438 cues had a weak influence and on their own could not reach the threshold by the end of the

439 song; in other words, females rarely commit to a positive decision before the end of the song.  
440 However, negative cues (i.e., unattractive song syllables) had a much stronger weight and even  
441 a few unattractive syllables could reach the threshold for not responding. In contrast, in males,  
442 we found that clear directional information had a strong weight and was capable of driving  
443 responses before the end of a typical female song. Both sexes had integration times that were  
444 longer than the duration of typical songs, but in females this likely serves less to enhance the  
445 signal-to-noise ratio (as we argue is the case for males), but rather to ensure the detection of  
446 unattractive elements at any point in the song, preventing them from initiating courtship with a  
447 low-quality or heterospecific male.

448  
449 There are some differences in the behavioral paradigms because females were tested for a  
450 response to songs with both positive and negative information on male attractiveness, while  
451 males were tested using only attractive syllables but with varied directional cues. Pattern and  
452 directional information are extracted from the song in parallel pathways and the pattern decision  
453 then gates turning [36]. Thus, turning in males in this study reflects both the attractiveness of the  
454 song syllable and the quality of directional cues. Despite these differences, both the female  
455 decision to respond and the male decision to turn signal readiness of each sex to further  
456 escalate the courtship interaction. Therefore, the integration differences between males and  
457 females reflect differences in the costs and benefits of decision-making strategies affecting each  
458 sex. Future studies examining integration of stimuli with unattractive pattern information in  
459 males would further elucidate sex differences in temporal processing in this species.

460  
461 The neural circuits that integrate directional cues over time to control male turning behavior are  
462 unknown. Peripheral circuits extract directional cues from afferent inputs but do not integrate  
463 this information across multiple syllables [49-51]. The evaluation of the song pattern and  
464 integration of directional cues is likely to happen in the brain and its results are relayed to the  
465 motor centers via descending interneurons [52], but this has not been assessed systematically.  
466 In the female brain, auditory activity has been recorded in the lateral protocerebrum, the  
467 superior medial protocerebrum and the central complex (CX) [53,54] and electrical stimulation of  
468 the CX can elicit the behavioral responses to song in females [55]. In the insect brain, the CX is  
469 a central circuit for orientation behavior with integrator properties [56,57]. It may therefore drive  
470 responses also in males and CX neurons themselves or their presynaptic partners may have  
471 sex-specific properties that reflect the sex-specific speed-accuracy trade-offs evident from  
472 behavior.

473  
474 Although the specific neural circuits have not been identified, our drift-diffusion model is realistic  
475 because it replicates identified neural processes. All model parameters map to biophysical  
476 properties of decision making neurons and circuits [58,59]: Sensory weights could correspond to  
477 the number and strength of synapses to an integrating neuron. The integration time constant  
478 could correspond for instance to the kinetics of intracellular calcium, or to factors that determine  
479 the dynamics of a recurrent network [60,61]. The decision threshold could correspond to a  
480 spiking threshold determined by the density of sodium channels at the spike initiation zone or  
481 controlled by neuromodulators [60,62,63]. Sexual selection could act on these parameters to  
482 produce the sex-specific integration of sensory information seen in grasshoppers. Our results

483 therefore point the way towards a study of the evolution of sensory processing mechanisms in  
484 realistic ecological contexts and natural behaviors.  
485

486 **References**

- 487 1. Gold, J. I. I. & Shadlen, M. N. 2007 The Neural Basis of Decision Making. *Annu. Rev. Neurosci.* **30**, 535–574.  
488 (doi:10.1146/annurev.neuro.29.051605.113038)
- 489 2. Heitz, R. P. 2014 The speed-accuracy tradeoff: history, physiology, methodology, and behavior. *Frontiers in*  
490 *Neuroscience* **8**, 865. (doi:10.3389/fnins.2014.00150)
- 491 3. Chittka, L., Skorupski, P. & Raine, N. E. 2009 Speed–accuracy tradeoffs in animal decision making. *Trends in*  
492 *Ecology & Evolution* **24**, 400–407. (doi:10.1016/j.tree.2009.02.010)
- 493 4. Reddi, B. A. & Carpenter, R. H. 2000 The influence of urgency on decision time. *Nature Neuroscience* **3**, 827–  
494 830. (doi:10.1038/77739)
- 495 5. Ratcliff, R. & McKoon, G. 2008 The diffusion decision model: theory and data for two-choice decision tasks.  
496 *Neural computation* **20(4)**, 873–922. (doi:10.1162/neco.2008.12-06-420)
- 497 6. Tajima, S., Drugowitsch, J. & Pouget, A. 2016 Optimal policy for value-based decision-making. *Nat Commun* **7**,  
498 12400. (doi:10.1038/ncomms12400)
- 499 7. Palmer, J., Huk, A. C. & Shadlen, M. N. 2005 The effect of stimulus strength on the speed and accuracy of a  
500 perceptual decision. *Journal of Vision* **5**, 1–1. (doi:10.1167/5.5.1)
- 501 8. Zylberberg, A., Fetsch, C. R., Shadlen, M. N. & Frank, M. J. 2016 The influence of evidence volatility on choice,  
502 reaction time and confidence in a perceptual decision. *eLife* **5**, e17688. (doi:10.7554/eLife.17688)
- 503 9. Davidson, J. D. & El-Hady, A. 2019 Foraging as an evidence accumulation process. *PLoS Comput Biol* **15**,  
504 e1007060. (doi:10.1371/journal.pcbi.1007060)
- 505 10. Piet, A. T., El-Hady, A. & Brody, C. D. 2018 Rats adopt the optimal timescale for evidence integration in a  
506 dynamic environment. *Nat Commun* **9**, 1–12. (doi:10.1038/s41467-018-06561-y)
- 507 11. Constantinople, C. M., Piet, A. T. & Brody, C. D. 2019 An Analysis of Decision under Risk in Rats. *Current Biology*  
508 **29**, 2066–2074.e5. (doi:10.1016/j.cub.2019.05.013)
- 509 12. Zhang, S. X., Miner, L. E., Boutros, C. L., Rogulja, D. & Crickmore, M. A. 2018 Motivation, Perception, and  
510 Chance Converge to Make a Binary Decision. *Neuron* **99**, 376–388. (doi:10.1016/j.neuron.2018.06.014)
- 511 13. Sponberg, S., Dyhr, J. P., Hall, R. W. & Daniel, T. L. 2015 Luminance-dependent visual processing enables moth  
512 flight in low light. *Science* **348**, 1245–1248. (doi:10.1126/science.aaa3042)
- 513 14. Stöckl, A. L., Kihlström, K., Chandler, S. & Sponberg, S. 2017 Comparative system identification of flower tracking  
514 performance in three hawkmoth species reveals adaptations for dim light vision. *Philosophical Transactions of the*  
515 *Royal Society B: Biological Sciences* **372**, 20160078. (doi:10.1098/rstb.2016.0078)
- 516 15. Chittka, L., Dyer, A. G., Bock, F. & Dornhaus, A. 2003 Bees trade off foraging speed for accuracy. *Nature* **424**,  
517 388–388. (doi:10.1038/424388a)
- 518 16. Wang, M.-Y., Brennan, C. H., Lachlan, R. F. & Chittka, L. 2015 Speed–accuracy trade-offs and individually  
519 consistent decision making by individuals and dyads of zebrafish in a colour discrimination task. *Animal Behaviour*  
520 **103**, 277–283. (doi:10.1016/j.anbehav.2015.01.022)
- 521 17. Franks, N. R., Dornhaus, A., Fitzsimmons, J. P. & Stevens, M. 2003 Speed versus accuracy in collective decision  
522 making. *Proceedings of the Royal Society of London. Series B: Biological Sciences* **270**, 2457–2463.  
523 (doi:10.1098/rspb.2003.2527)
- 524 18. Bonachea, L. A. & Ryan, M. J. 2011 Localization Error and Search Costs during Mate Choice in Túngara Frogs,  
525 *Physalaemus pustulosus*. *Ethology* **117**, 56–62. (doi:10.1111/j.1439-0310.2010.01843.x)



- 526 19. Ings, T. C. & Chittka, L. 2008 Speed-Accuracy Tradeoffs and False Alarms in Bee Responses to Cryptic  
527 Predators. *Current Biology* **18**, 1520–1524. (doi:10.1016/j.cub.2008.07.074)
- 528 20. El-Hady, A., Davidson, J. D. & Gordon, D. M. 2019 Editorial: An Ecological Perspective on Decision-Making:  
529 Empirical and Theoretical Studies in Natural and Natural-Like Environments. *Front. Ecol. Evol.* **7**, 712.  
530 (doi:10.3389/fevo.2019.00461)
- 531 21. Dickson, B. J. 2008 Wired for sex: the neurobiology of Drosophila mating decisions. *Science (New York, N.Y.)*  
532 **322**, 904–909. (doi:10.1126/science.1159276)
- 533 22. Yang, C. F. & Shah, N. M. 2014 Representing Sex in the Brain, One Module at a Time. *Neuron* **82**, 261–278.  
534 (doi:10.1016/j.neuron.2014.03.029)
- 535 23. Reichert, M. S. & Ronacher, B. 2019 Temporal integration of conflicting directional cues in sound localization. *J.*  
536 *Exp. Biol.* **222(23)**, jeb.208751. (doi:10.1242/jeb.208751)
- 537 24. Helversen, von, D. 1972 Gesang des Männchens und Lautschema des Weibchens bei der Feldheuschrecke  
538 Chorthippus biguttulus (Orthoptera, Acrididae). *Journal of Comparative Physiology: Neuroethology, Sensory,*  
539 *Neural, and Behavioral Physiology* **81**, 381–422. (doi:10.1007/BF00697757)
- 540 25. Helversen, von, O. & Helversen, von, D. 1994 Forces driving coevolution of song and song recognition in  
541 grasshoppers. 253–284. In: Schildberger K., Elsner N. (eds) Neural basis of behavioural adaptations. Fischer,  
542 Stuttgart.
- 543 26. Helversen, von, D. 1997 Acoustic communication and orientation in grasshoppers. 301–341. In: Lehrer M. (ed.)  
544 Orientation and communication in arthropods. Birkhäuser, Basel.
- 545 27. Kuijper, B., Pen, I. & Weissing, F. J. 2012 A Guide to Sexual Selection Theory. *Annu. Rev. Ecol. Evol. Syst.* **43**,  
546 287–311. (doi:10.1146/annurev-ecolsys-110411-160245)
- 547 28. Kriegbaum, H. 1989 Female choice in the grasshopper Chorthippus biguttulus. *Naturwissenschaften* **76**, 81–82.  
548 (doi:10.1007/BF00396715)
- 549 29. Clemens, J., Krämer, S. & Ronacher, B. 2014 Asymmetrical integration of sensory information during mating  
550 decisions in grasshoppers. *Proc Natl Acad Sci U S A* **111**, 16562–16567. (doi:10.1073/pnas.1412741111)
- 551 30. Clemens, J., Aufderheide, J. & Ronacher, B. 2017 Relative weighting of acoustic information during mating  
552 decisions in grasshoppers indicates signatures of sexual selection. *J Comp Physiol A* **203**, 891–901.  
553 (doi:10.1007/s00359-017-1200-x)
- 554 31. Kriegbaum, H. & Helversen, von, O. 1992 Influence of Male Songs on Female Mating Behavior in the  
555 Grasshopper Chorthippus biguttulus (Orthoptera: Acrididae). *Ethology* **91**, 248–254. (doi:10.1111/j.1439-  
556 0310.1992.tb00866.x)
- 557 32. Römer, H. 2013 Masking by Noise in Acoustic Insects: Problems and Solutions. 33–63. In: Brumm, H. (ed.)  
558 Animal Communication and Noise. Springer, Berlin.
- 559 33. Wirmer, A., Faustmann, M. & Heinrich, R. 2010 Reproductive behaviour of female Chorthippus biguttulus  
560 grasshoppers. *Journal of Insect Physiology* **56**, 745–753. (doi:10.1016/j.jinsphys.2010.01.006)
- 561 34. Heinrich, R., Kunst, M. & Wirmer, A. 2012 Reproduction-Related Sound Production of Grasshoppers Regulated  
562 by Internal State and Actual Sensory Environment. *Frontiers in Neuroscience* **6**. (doi:10.3389/fnins.2012.00089)
- 563 35. Reichert, M. S. 2015 Effects of noise on sound localization in male grasshoppers, Chorthippus biguttulus. *Animal*  
564 *Behaviour* **103**, 125–135. (doi:10.1016/j.anbehav.2015.02.020)
- 565 36. Helversen, von, D. & Helversen, von, O. 1995 Acoustic pattern recognition and orientation in orthopteran insects:  
566 parallel or serial processing? *Journal of Comparative Physiology A: Neuroethology, Sensory, Neural, and*  
567 *Behavioral Physiology* **177**, 767–774. (doi:10.1007/BF00187635)

- 568 37. Helversen, von, D. & Helversen, von, O. 1997 Recognition of sex in the acoustic communication of the  
569 grasshopper *Chorthippus biguttulus* (Orthoptera, Acrididae). *Journal of Comparative Physiology A:*  
570 *Neuroethology, Sensory, Neural, and Behavioral Physiology* **180**, 373–386. (doi:10.1007/s003590050056)
- 571 38. Ronacher, B. & Krahe, R. 1998 Song recognition in the grasshopper *Chorthippus biguttulus* is not impaired by  
572 shortening song signals: implications for neuronal encoding. *J Comp Physiol A* **183**, 729–735.  
573 (doi:10.1007/s003590050295)
- 574 39. Wolf, H. 1986 Response patterns of two auditory interneurons in a freely moving grasshopper (*Chorthippus*  
575 *biguttulus* L.). *Journal of Comparative Physiology A: Neuroethology, Sensory, Neural, and Behavioral Physiology*  
576 **158**, 689–696. (doi:10.1007/BF00603826)
- 577 40. Helversen, von, D. & Rheinlaender, J. 1988 Interaural intensity and time discrimination in an unrestrained  
578 grasshopper: a tentative behavioural approach. *J Comp Physiol A* **162**, 333–340. (doi:10.1007/BF00606121)
- 579 41. Stine, G. M., Zylberberg, A., Ditterich, J. & Shadlen, M. N. 2020 Differentiating between integration and non-  
580 integration strategies in perceptual decision making. *eLife* **9**, 8213. (doi:10.7554/eLife.55365)
- 581 42. Cisek, P., Puskas, G. A. & El-Murr, S. 2009 Decisions in changing conditions: the urgency-gating model. *Journal*  
582 *of Neuroscience* **29**, 11560–11571. (doi:10.1523/JNEUROSCI.1844-09.2009)
- 583 43. Mitchell, M. 1998 *An Introduction to Genetic Algorithms (Complex Adaptive Systems)*. Third Printing. A Bradford  
584 Book.
- 585 44. Clemens, J. & Ronacher, B. 2013 Feature extraction and integration underlying perceptual decision making during  
586 courtship behavior. *Journal of Neuroscience* **33**, 12136–12145. (doi:10.1523/JNEUROSCI.0724-13.2013)
- 587 45. Helversen, von, D. & Helversen, von, O. 1975 Verhaltensgenetische Untersuchungen am akustischen  
588 Kommunikationssystem der Feldheuschrecken (Orthoptera, Acrididae). *J Comp Physiol* **104**, 301–323.  
589 (doi:10.1007/BF01379054)
- 590 46. Michelsen, A. & Rohrseitz, K. 1997 Sound localisation in a habitat: an analytical approach to quantifying the  
591 degradation of directional cues. *Bioacoustics* **7**, 291–313. (doi:10.1080/09524622.1997.9753341)
- 592 47. Dunlap, A. S., McLinn, C. M., MacCormick, H. A., Scott, M. E. & Kerr, B. 2009 Why some memories do not last a  
593 lifetime: dynamic long-term retrieval in changing environments. *Behavioral Ecology* **20**, 1096–1105.  
594 (doi:10.1093/beheco/arp102)
- 595 48. Kodric-Brown, A. 1986 Satellites and sneakers: opportunistic male breeding tactics in pupfish (*Cyprinodon*  
596 *pecosensis*). *Behavioral Ecology and Sociobiology* **19**, 425–432.
- 597 49. Stumpner, A., Ronacher, B. & Helversen, von, O. 1991 Auditory Interneurons in the Metathoracic Ganglion of the  
598 Grasshopper *Chorthippus Biguttulus*: II. Processing of Temporal Patterns of the Song of the Male. *J. Exp. Biol.*  
599 **158**, 411–430.
- 600 50. Stumpner, A. & Ronacher, B. 1991 Auditory Interneurons in the Metathoracic Ganglion of the Grasshopper  
601 *Chorthippus Biguttulus*: I. Morphological and Physiological Characterization. *J. Exp. Biol.* **158**, 391–410.
- 602 51. Stumpner, A. & Ronacher, B. 1994 Neurophysiological Aspects of Song Pattern Recognition and Sound  
603 Localization in Grasshoppers. *Amer. Zool.* **34**, 696–705.
- 604 52. Ronacher, B., Helversen, von, D. & Helversen, von, O. 1986 Routes and stations in the processing of auditory  
605 directional information in the CNS of a grasshopper, as revealed by surgical experiments. *Journal of Comparative*  
606 *Physiology A: Neuroethology, Sensory, Neural, and Behavioral Physiology* **158**, 363–374.  
607 (doi:10.1007/BF00603620)
- 608 53. Kutzki, O. 2012 *Kodierung verhaltensrelevanter Gesangsparameter bei Chorthippus biguttulus*. PhD Thesis,  
609 Humboldt-Universität zu Berlin, Mathematisch-Naturwissenschaftliche Fakultät I. (doi:10.18452/16520)

- 610 54. Bhavsar, M. B., Heinrich, R. & Stumpner, A. 2015 Multielectrode recordings from auditory neurons in the brain of  
611 a small grasshopper. - PubMed - NCBI. *Journal of Neuroscience Methods* **256**, 63–73.  
612 (doi:10.1016/j.jneumeth.2015.08.024)
- 613 55. Bhavsar, M.B., Stumpner, A. & Heinrich, R. 2017 Brain regions for sound processing and song release in a small  
614 grasshopper. *Journal of Insect Physiology* **99**, 15–24.
- 615 56. Pfeiffer, K. & Homberg, U. 2014 Organization and functional roles of the central complex in the insect brain.  
616 *Annual Review of Entomology* **59**, 165–184. (doi:10.1146/annurev-ento-011613-162031)
- 617 57. Seelig, J. D. & Jayaraman, V. 2015 Neural dynamics for landmark orientation and angular path integration. *Nature*  
618 **521**, 186–191. (doi:10.1038/nature14446)
- 619 58. Brody, C. D. & Hanks, T. D. 2016 Neural underpinnings of the evidence accumulator. *Current Opinion in*  
620 *Neurobiology* **37**, 149–157. (doi:10.1016/j.conb.2016.01.003)
- 621 59. O'Connell, R. G., Shadlen, M. N., Wong-Lin, K. & Kelly, S. P. 2018 Bridging Neural and Computational Viewpoints  
622 on Perceptual Decision-Making. *Trends in Neurosciences* **41**, 838–852. (doi:10.1016/j.tins.2018.06.005)
- 623 60. Zhang, S. X., Rogulja, D. & Crickmore, M. A. 2019 Recurrent Circuitry Sustains Drosophila Courtship Drive While  
624 Priming Itself for Satiety. *Current Biology* **29**, 3216–3228. (doi:10.1016/j.cub.2019.08.015)
- 625 61. Deutsch, D. et al. 2020 The Neural Basis for a Persistent Internal State in Drosophila Females. *bioRxiv* **1**,  
626 2020.02.13.947952. (doi:10.1101/2020.02.13.947952)
- 627 62. Marder, E. & Thirumalai, V. 2002 Cellular, synaptic and network effects of neuromodulation. *Neural Networks* **15**,  
628 479–493.
- 629 63. Bargmann, C. I. 2012 Beyond the connectome: How neuromodulators shape neural circuits. *Bioessays* **34**, 458–  
630 465. (doi:10.1002/bies.201100185)
- 631
